# Supplementary material for: A global analysis of dairy consumption and incident cardiovascular disease
Source: PubMed Central journal article supplement — Nat Commun. 2025 Jan 6;16:437. doi: 10.1038/s41467-024-55585-0 (PMC11704150; doi:10.1038/s41467-024-55585-0), 2025-01-06
Supplement: 41467_2024_55585_MOESM3_ESM.pdf [file 41467_2024_55585_MOESM3_ESM.pdf]

## **Description of Additional Supplementary Files**

### **File Name: Supplementary Data 1**

Description: Baseline characteristics of participants by frequency of dairy consumption in the China Kadoorie Biobank

### **File Name: Supplementary Data 2**

Description: Baseline characteristics of participants by total dairy consumption from 24 h dietary recalls in UK Biobank

### **File Name: Supplementary Data 3**

Description: Baseline characteristics of participants by frequency of cheese consumption in UK Biobank

### **File Name: Supplementary Data 4**

Description: Baseline characteristics of participants by milk type in UK Biobank

### **File Name: Supplementary Data 5**

Description: Hazard ratios (95% confidence intervals) for incident cardiovascular disease for each 50 g/day increase in usual dairy intake in the China Kadoorie Biobank

### **File Name: Supplementary Data 6**

Description: Hazard ratios (95% confidence intervals) for incident cardiovascular disease according to cheese consumption in UK Biobank

### **File Name: Supplementary Data 7**

Description: Associations between cheese consumption from 24 h dietary recalls and cardiovascular disease risk in the UK Biobank

### **File Name: Supplementary Data 8**

Description: Associations between hard cheese consumption from 24 h dietary recalls and cardiovascular disease risk in the UK Biobank

### **File Name: Supplementary Data 9**

Description: Associations between fresh cheese consumption from 24 h dietary recalls and cardiovascular disease risk in the UK Biobank

### **File Name: Supplementary Data 10**

Description: Associations between other cheese consumption from 24 h dietary recalls

and cardiovascular disease risk in the UK Biobank

**File Name: Supplementary Data 11**

Description: Associations between low-fat cheese consumption from 24 h dietary recalls and cardiovascular disease risk in the UK Biobank

**File Name: Supplementary Data 12**

Description: Associations between high-fat cheese consumption from 24 h dietary recalls and cardiovascular disease risk in the UK Biobank

**File Name: Supplementary Data 13**

Description: Associations between milk consumption from 24 h dietary recalls and cardiovascular disease risk in the UK Biobank

**File Name: Supplementary Data 14**

Description: Associations between yogurt consumption from 24 h dietary recalls and cardiovascular disease risk in the UK Biobank

**File Name: Supplementary Data 15**

Description: Associations between ice-cream consumption from 24 h dietary recalls and cardiovascular disease risk in the UK Biobank

**File Name: Supplementary Data 16**

Description: Associations between milk type and cardiovascular disease risk in the UK Biobank

**File Name: Supplementary Data 17**

Description: Associations of frequency of dairy consumption with cardiovascular disease, coronary heart disease, and stroke in subgroups in the China Kadoorie Biobank

**File Name: Supplementary Data 18**

Description: Associations of total dairy consumption with cardiovascular disease, coronary heart disease, and stroke in subgroups in the UK Biobank

**File Name: Supplementary Data 19**

Description: Associations of frequency of cheese consumption with cardiovascular disease, coronary heart disease, and stroke in subgroups in the UK Biobank

**File Name: Supplementary Data 20**

Description: Associations of milk type with cardiovascular disease, coronary heart

disease, and stroke in subgroups in the UK Biobank

**File Name: Supplementary Data 21**

Description: Multi-variable hazard ratios (95% CIs) of cardiovascular disease, coronary heart disease and stroke risk associated with dairy consumption from sensitivity analyses in the China Kadoorie Biobank

**File Name: Supplementary Data 22**

Description: Multi-variable hazard ratios (95% CIs) of cardiovascular disease, coronary heart disease and stroke risk associated with total dairy consumption from sensitivity analyses in the UK Biobank

**File Name: Supplementary Data 23**

Description: Multi-variable hazard ratios (95% CIs) of cardiovascular disease, coronary heart disease and stroke risk associated with cheese consumption from sensitivity analyses in the UK Biobank

**File Name: Supplementary Data 24**

Description: Multi-variable hazard ratios (95% CIs) of cardiovascular disease, coronary heart disease and stroke risk associated with milk type from sensitivity analyses in the UK Biobank

**File Name: Supplementary Data 25**

Description: Study characteristics in the meta-analysis

**File Name: Supplementary Data 26**

Description: Overview of the covariates adjusted in multivariable model among studies in the meta-analysis

**File Name: Supplementary Data 27**

Description: Assessment of risk of bias with the Newcastle-Ottawa Scale

**File Name: Supplementary Data 28**

Description: Subgroup meta-analysis using random effects models for the associations between cardiovascular disease risk and dairy consumption

**File Name: Supplementary Data 29**

Description: Association of different subtypes of dairy consumption with subgroups of CVD risk for high compared with low intake using fixed-effects meta-analysis

**File Name: Supplementary Data 30**

Description: GRADE evidence profile for prospective cohort studies of dairy products and cardiovascular disease

**File Name: Supplementary Data 31**

Description: Numbers of 24 h dietary records for participants included in analysis of UK Biobank

**File Name: Supplementary Data 32**

Description: The Spearman coefficients of cheese intake frequency between baseline and resurveys

**File Name: Supplementary Data 33**

Description: Codes to identify cardiovascular cases

**File Name: Supplementary Data 34**

Description: Meta-analysis search strategy
